# Supplementary material
Source: Research Square preprint supplement (doi:10.21203/rs.3.rs-8485171/v1)
Supplement: Supplementary file 1 [file 0ceab142a756569e8b0bec30.docx]

A

B

C

D

E

F


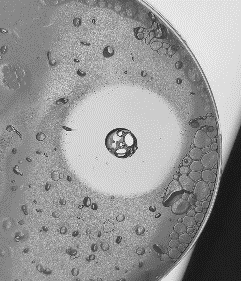

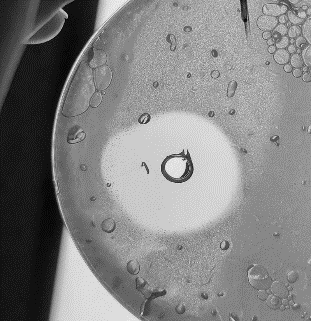

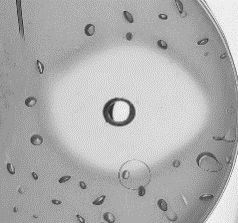

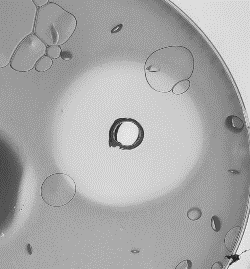

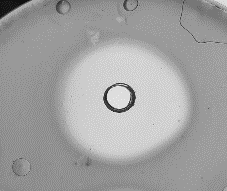

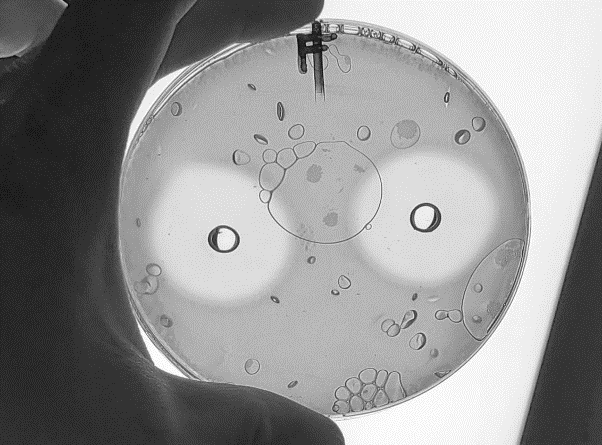


**Supplementary Fig. 1.** Growth inhibition of representative *C. perfringens* and *C. difficile* strains by B. subtilis BSC35 CFS in well diffusion assay. CFS was prepared from cultures grown in TSB (A–C) or optimized F4 medium (D–F). Indicators: *C. perfringens* 17-069 (A, D), *C. difficile* UK001 (B, E), and *C. difficile* R017/ATCC 43598 (C, F). Clear inhibition zones indicate antibacterial activity of BLIS BSC35.
